# Supplementary material
Source: publisher site journal article supplement (https://jhr.pensoft.net/article/59365/download/suppl/36/)
Supplement: Supplementary file 1

Suppl. material 6. Figure S4

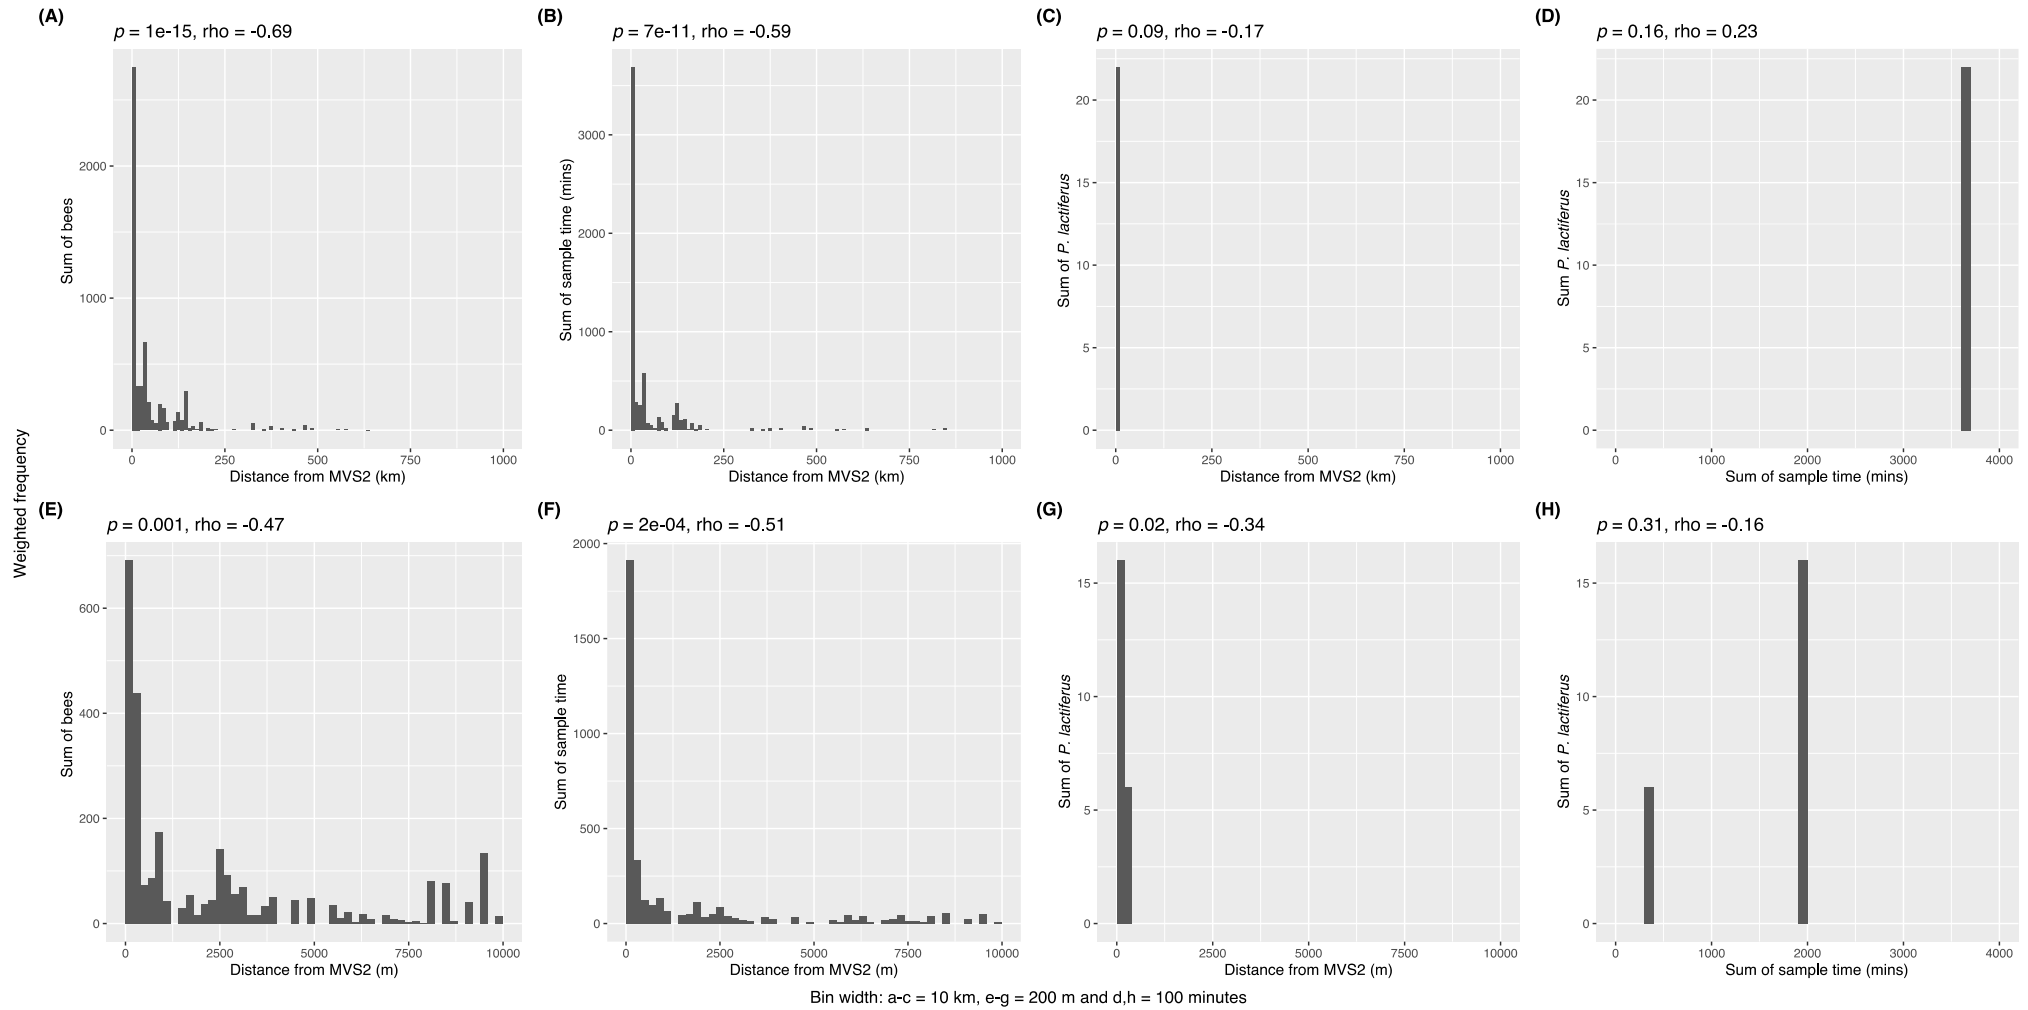

**Figure S4.** The sum of **A** number of bees, **B** sample time (mins) and **C** *P. lactiferus* by distance from major vegetations subgroup (MVS) 2 – Tropical or Sub-Tropical Rainforest – in 10 km bins. The sum of **E** number of bees, **F** sample time (mins) and **G** *P. lactiferus* by distance from MVS 2 in the first 10 km bin of a, b and c split in 200 m bins. The sum of *P. lactiferus* in **D** 10 km bins and **H** 200 m bins over sampling time (mins) where bin width is 100 minutes. *P* and  $\rho$  values are from a two-sided Spearman's rank correlation test, where the sign of  $\rho$  indicates the direction and the absolute value indicates strength of relationship ( $H_0 =$  zero, maximum strength = one).
